# Supplementary material
Source: PubMed Central journal article supplement (PMC3632958)
Supplement: AAC.01809-12_zac999101823so1.pdf [file AAC.01809-12_zac999101823so1.pdf]

1 **Supplemental Material**

2

3 **Strains used in this study**

4 **Supplemental table S1** describes the known features of the strains used in this study and gives  
5 references and origin where available.

6

7 **Expanded fungal panel**

8 To investigate the robustness of the measured MIC values on the strains presented in **table 3** we  
9 have expanded the testing to additional strains, mostly clinical isolates (see **supplemental table**  
10 **S1**). As presented in **supplemental table S2** the general activity on these species and target  
11 inhibition bypass upon addition of valine and isoleucine but not lysine could be confirmed across  
12 the entire panel of strains.

13

14 **HIP HOP Profiles for all compounds used in this study**

15 The complete HIP HOP profiles are provided as tab delimited .txt files contained in the  
16 compressed **Supplemental\_Material\_S3.zip** file. The digital file is available on the Dryad  
17 website (<http://dx.doi.org/10.5061/dryad.qb753>). The sensitivity and z-scores for all HIP  
18 strains present in the pool across all tested compounds are listed in the HIP-exp-scores-  
19 annotation.txt file. Scores for all HOP strains present in the pool are listed in the HOP-exp-  
20 scores-annotation.txt file. To reproduce the plots depicted in the article the sensitivity can be  
21 plotted on the y-axis, the z-score on the x-axis. Each gene is annotated with systematic name,  
22 common name, description, GO category etc.

23

24 ***In silico* docking model**

25 The presented *in silico* docking solution is provided as a standard Protein Data Bank file named  
26 1N0H\_compound1\_docked.pdb. contained in the **Supplemental\_Data\_S4.zip** file. The digital  
27 file is available on the Dryad website (<http://dx.doi.org/10.5061/dryad.qb753>). UNK1  
28 refers to the docked compound 1, all other structures are labeled as in the original 1N0H.pdb file  
29 downloaded from RCSB protein databank [www.pdb.org](http://www.pdb.org).
